# Supplementary material for: Molecular imaging of T cell co-regulator factor B7-H3 with 89Zr-DS-5573a
Source: PubMed Central journal article supplement — Theranostics. 2018 Jul 30;8(15):4199–209. doi: 10.7150/thno.25575 (PMC6096400; doi:10.7150/thno.25575), 2018-07-30
Supplement: thnov08p4199s1.pdf [file thnov08p4199s1.pdf]

## Molecular imaging of T cell co-regulator factor B7-H3 with <sup>89</sup>Zr-DS-5573a

Ingrid Julienne Georgette Burvenich<sup>1,2\*</sup>, Sagun Parakh<sup>1,2,3\*</sup>, Fook-Thean Lee<sup>1</sup>, Nancy Guo<sup>1</sup>, Zhanqi Liu<sup>1,2</sup>, Hui Kong Gan<sup>1,2,3,4</sup>, Angela Rigopoulos<sup>1,2</sup>, Graeme Joseph O'Keefe<sup>4,5</sup>, Sylvia Jie Gong<sup>5,6</sup>, Yit Wooi Goh<sup>1</sup>, Henri Tochon-Danguy<sup>5</sup>, Fiona Elizabeth Scott<sup>1,2</sup>, Masakatsu Kotsuma<sup>7</sup>, Kenji Hirotsu<sup>8</sup>, Giorgio Senaldi<sup>9</sup> and Andrew M. Scott<sup>1,2,3,4,5</sup>

<sup>1</sup>Tumour Targeting Laboratory, Ludwig Institute for Cancer Research and Olivia Newton-John Cancer Research Institute, Melbourne, Australia

<sup>2</sup>School of Cancer Medicine, La Trobe University, Melbourne, Australia

<sup>3</sup>Department of Medical Oncology, Austin Health, Heidelberg, Melbourne, Australia

<sup>4</sup>Department of Medicine, University of Melbourne, Melbourne, Australia

<sup>5</sup>Department of Molecular Imaging and Therapy, Austin Health, Melbourne, Australia

<sup>6</sup>School of Engineering and Mathematical Sciences, La Trobe University

<sup>7</sup>Quantitative Clinical Pharmacology & Translational Sciences, Daiichi Sankyo, Inc., Basking Ridge, NJ, USA

<sup>8</sup>Biologics & Immuno-Oncology Laboratories, Daiichi-Sankyo Co., Ltd., Tokyo, Japan

<sup>9</sup>Department of Translational Medicine and Clinical Pharmacology, Daiichi-Sankyo Pharma Development, Edison, NJ, USA

\* - authors contributed equally

**Corresponding Author:** Professor Andrew M. Scott, Tumour Targeting Laboratory, Olivia Newton-John Cancer Research Institute, Level 5, ONJ Cancer Centre, 145 Studley Road, Heidelberg, Victoria 3084, Australia; Phone: 61-39496-5876; Fax: 61-39496-5334; E-mail: [andrew.scott@onjcri.org.au](mailto:andrew.scott@onjcri.org.au)

## INDEX

### Supplementary Figures

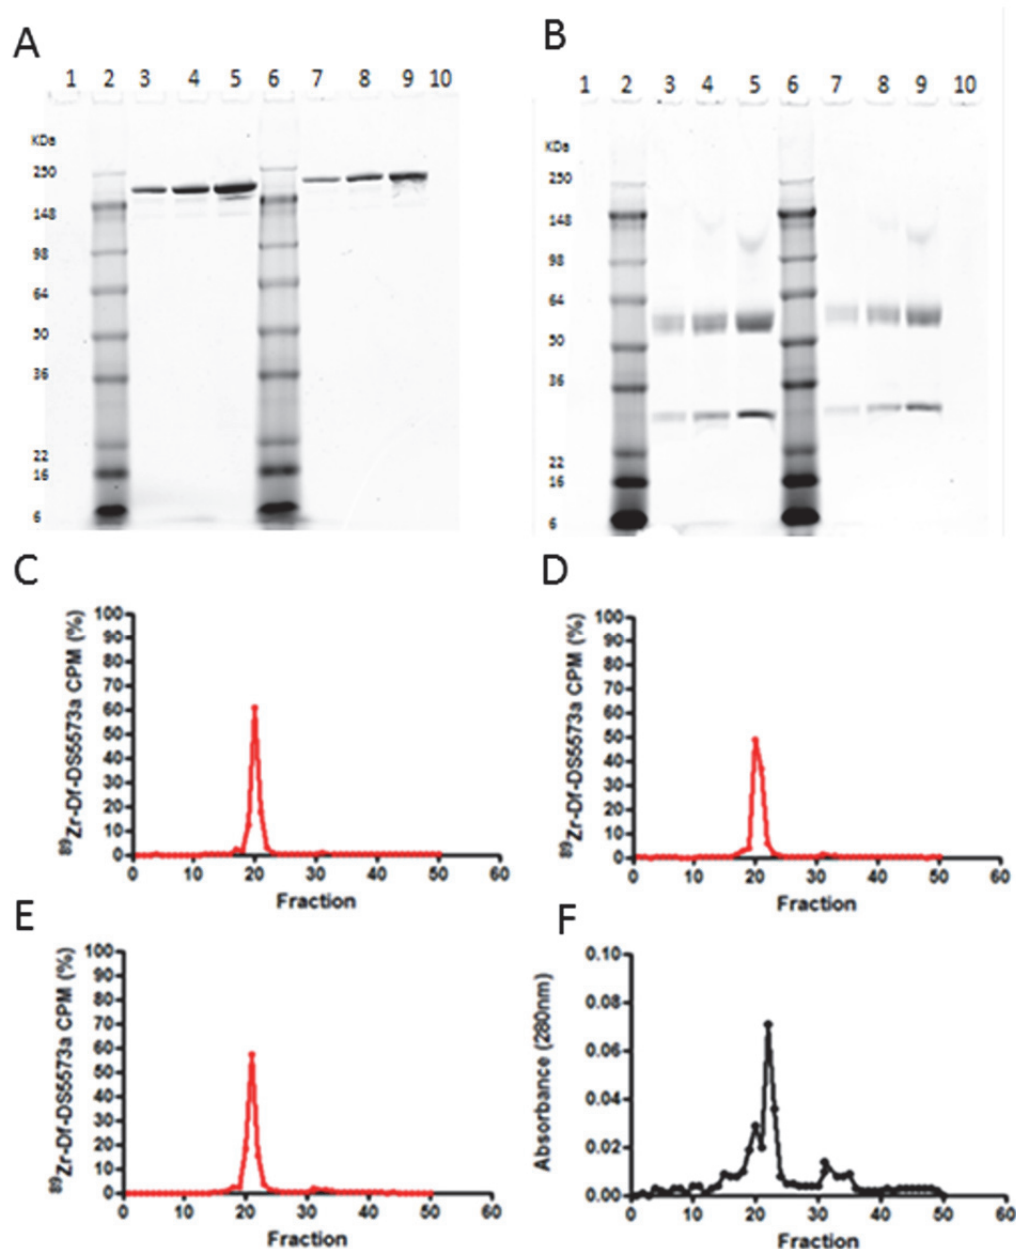

**Figure S1 – Quality control of chelation and radiolabeling of  $^{89}\text{Zr}$ -DS-5573a.** SDS-PAGE analysis of native DS-5573a and Df-Bz-NCS-DS-5573a under non-reduced (A) and reduced conditions (B). The Df-Bz-NCS-DS-5573a was prepared without loss of structural integrity. Superdex 200 HR 10/30 Column Size Exclusion Chromatography (SEC) Analysis of  $^{89}\text{Zr}$ -Df-Bz-NCS-DS-5573a integrity during incubation for 7 days in human serum at 37°C. The radiochromatograms (red) show one single peak at day 0 (C), day 3 (D) and day 7 (E). The UV chromatograms (black) show two peaks representing thyroglobulin (700 kDa, fraction 20) and human serum albumin (66 kDa, fraction 22).

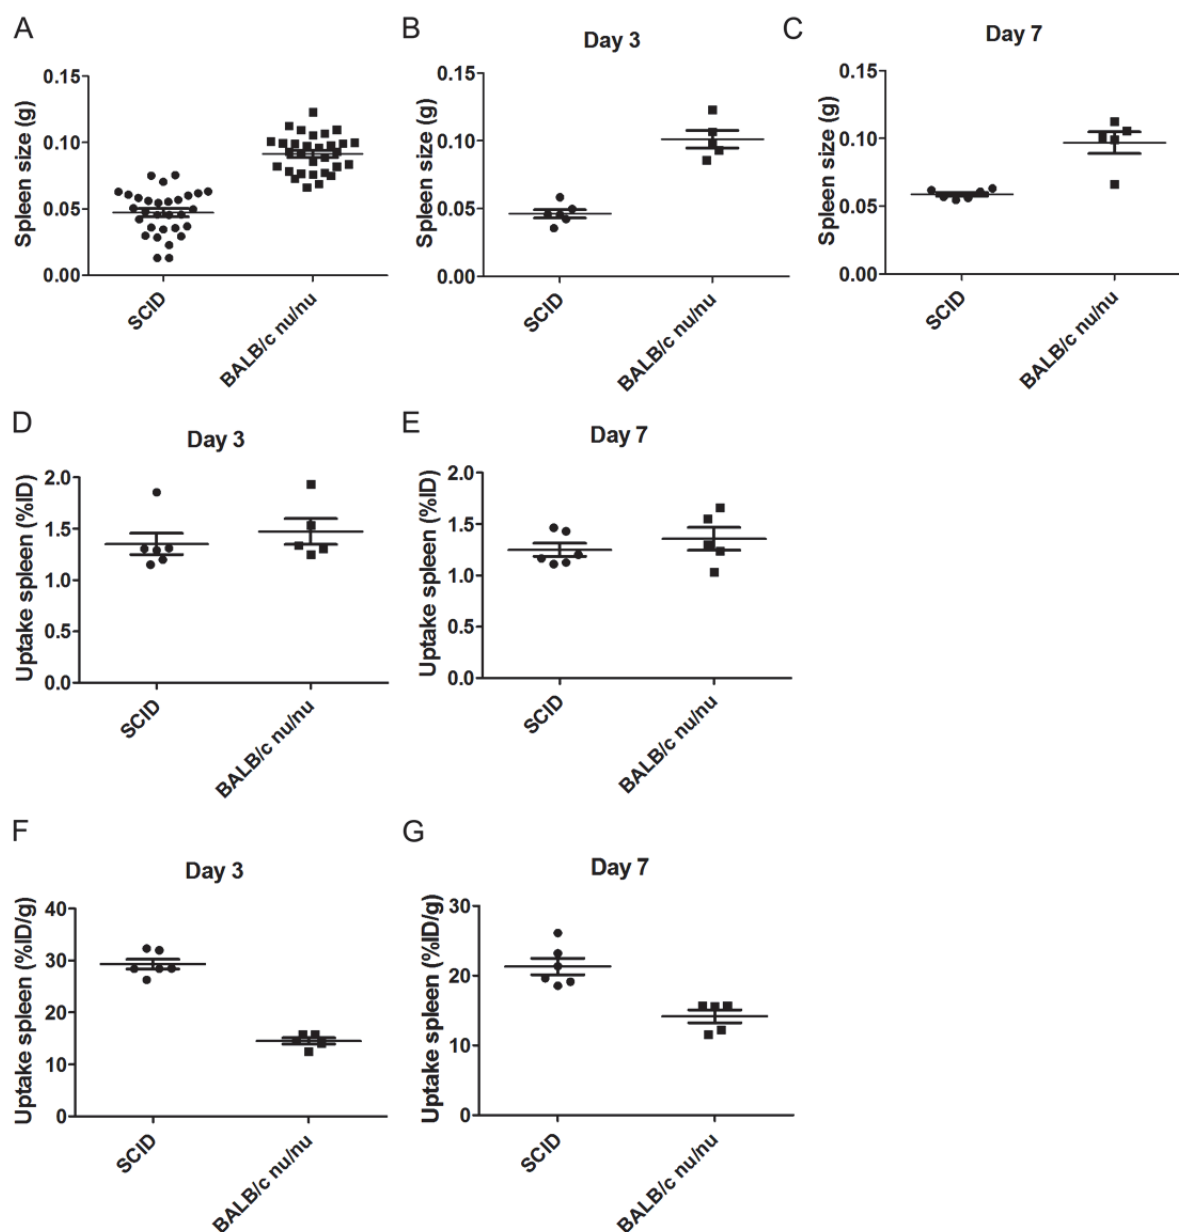

**Figure S2 – Influence of spleen size in different mouse strains on measured radioactivity concentration of  $^{89}\text{Zr}$ -DS-5573a in the spleen. (A)** Average weight of spleen from SCID mice versus BALB/c *nu/nu* mice ( $n = 30$ ). **(B-C)** Spleen sizes measured in SCID mice ( $n = 6$ ) and BALB/c *nu/nu* mice ( $n = 5$ ) used for biodistribution study on day 3 post injection **(B)** and day 7 post injection **(C)**. **(D-E)** Radioactivity measured in the spleen at day 3 post injection in BALB/c *nu/nu* mice versus SCID mice presented as percentage injected dose **(D)** and percentage injected dose per gram tissue **(E)**. **(F-G)** Radioactivity measured in the spleen at day 7 post injection in BALB/c *nu/nu* mice versus SCID mice presented as percentage injected dose **(F)** and percentage injected dose per gram tissue **(G)**.



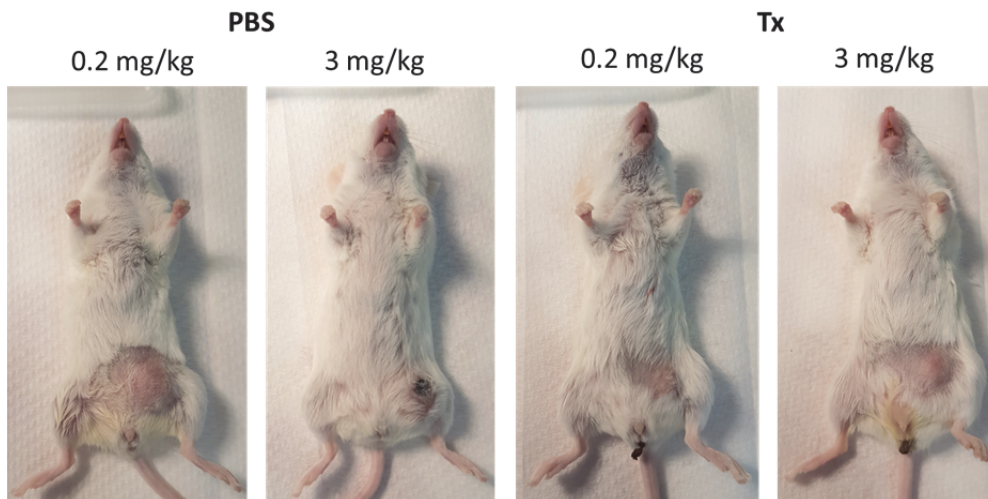

**Figure S4** – Mice used to generate Figure 6E demonstrating the presence of a blood crust in the PBS-treated mouse injected with  $^{89}\text{Zr}$ - Df-Bz-NCS-DS-5573 at a total dose of 3 mg/kg.
